# Supplementary material for: Morc3 mutant mice exhibit reduced cortical area and thickness, accompanied by altered haematopoietic stem cells niche and bone cell differentiation
Source: PubMed Central journal article supplement (PMC4870562; doi:10.1038/srep25964), 2016-05-18
Supplement: srep25964-s1.pdf [file srep25964-s1.pdf]

**Morc3 mutant mice exhibit reduced cortical area and thickness, accompanied by altered haematopoietic stem cells niche and bone cell differentiation**

**Authors:** Gaurav Jadhav, Dian Teguh, Jacob Kenny, Jennifer Tickner, Jiake Xu

## **Supplementary Information**

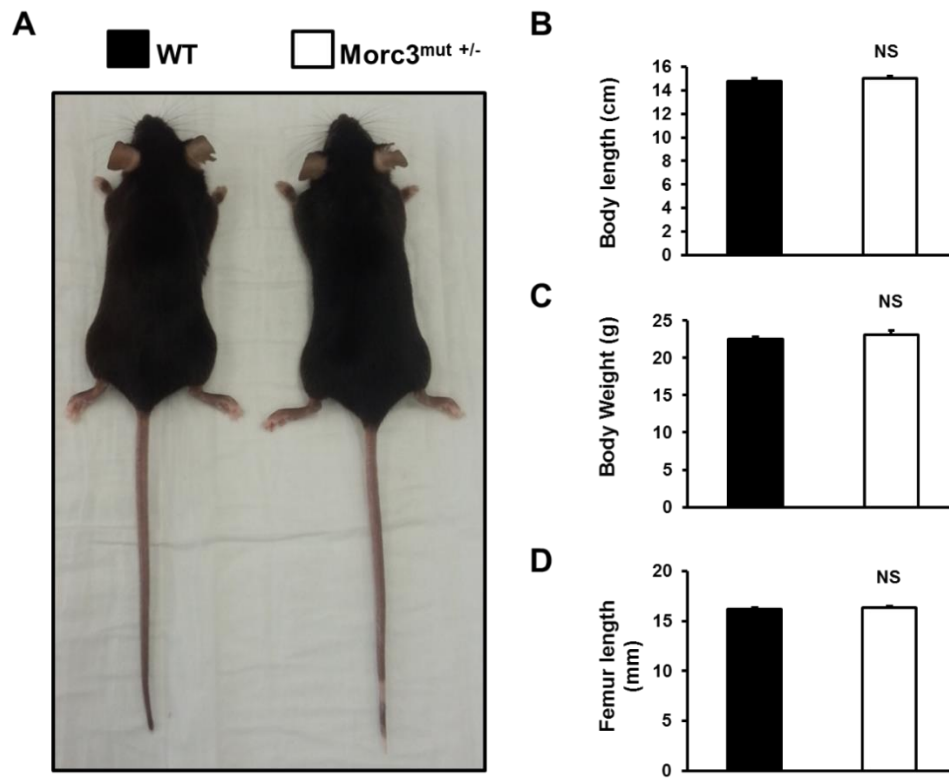

**Supplementary Figure 1. No major differences in Morc3<sup>mut +/-</sup> mice.** (A) 12 week old female WT and Morc3<sup>mut +/-</sup> mice. (B) Morc3<sup>mut +/-</sup> mice had similar body structure as compared to WT controls. (C) Body weight and (D) total femur length of Morc3<sup>mut +/-</sup> mice did not differ significantly as compared to WT controls (n=6). Data are presented as mean  $\pm$  SEM. NS=non-significant

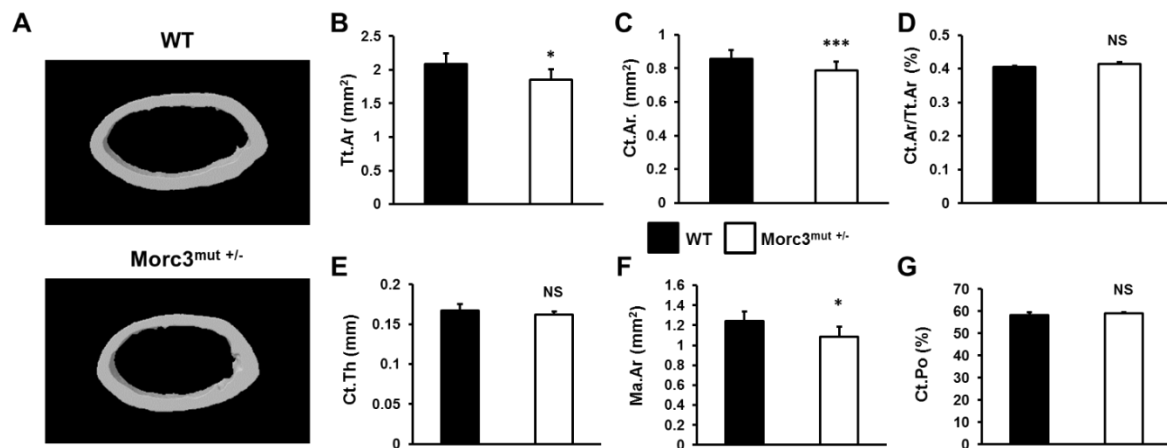

**Supplementary Figure 2: Reduced cortical bone mass in older male Morc3<sup>mut+/-</sup> mice.**

MicroCT analysis of cortical bone from 24 week old male WT and Morc3<sup>mut+/-</sup> mice showed a reduction in cortical bone area and medullary area (n=5). (A) Representative 3D reconstructions of cortical bone in 24 week old WT and Morc3<sup>mut+/-</sup> mice. (B-G) Cortical bone parameters as assessed by microCT; (B) total cortical area (Tt.Ar; mm<sup>2</sup>), (C) cortical bone area (Ct.Ar; mm<sup>2</sup>), (D) cortical area fraction (Ct.Ar/Tt.Ar; %), (E) cortical thickness (Ct.Th; μm), (F) medullary area (Ma.Ar; mm<sup>2</sup>) and (G) cortical porosity (Ct.Po; %). Data are presented as mean ± SEM. NS=non-significant; \*P<0.05; \*\*\*P<0.001.

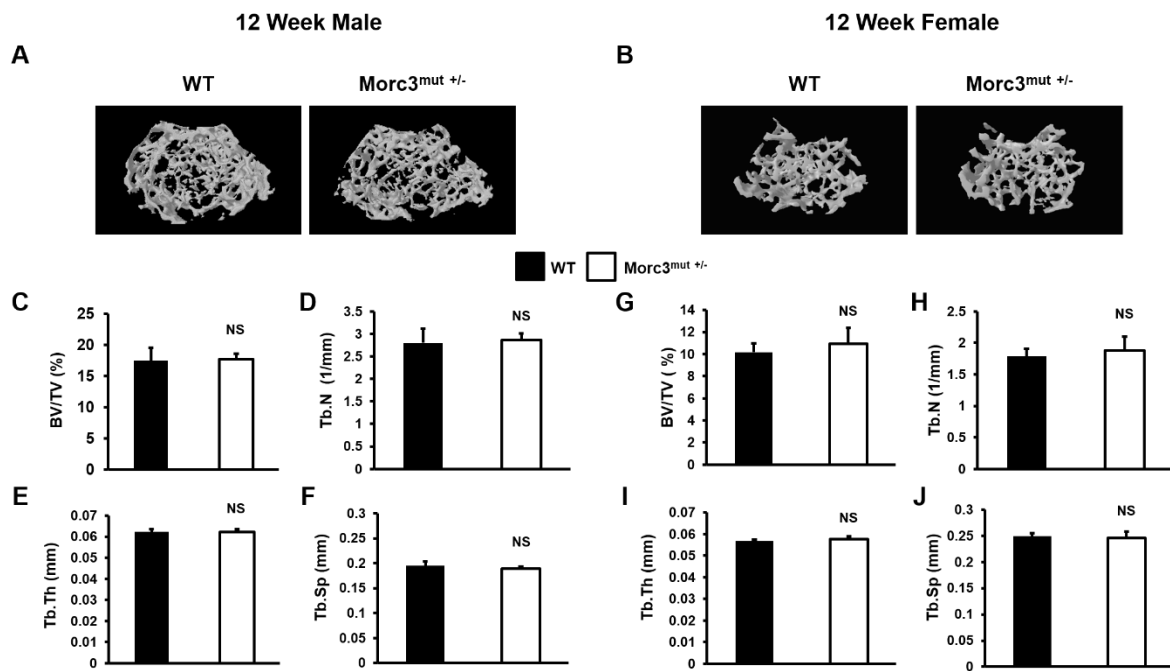

**Supplementary Figure 3: Morc3<sup>mut +/-</sup> mice have normal trabecular bone parameters.**

MicroCT analysis of femurs from 12 week old male and female mutant mice revealed no difference in trabecular bone mass as compared to femurs from WT controls (n=9). (A,B) Representative 3D reconstruction of trabecular bone from male and female mice respectively. (C-F) and (G-J) Results from analysis of trabecular bone parameters; bone volume per total volume (BV/TV; %), trabecular number (Tb.N; 1/mm), trabecular thickness (Tb.Th; mm), trabecular separation (Tb.Sp; mm) in male and female mice respectively. Data are presented as mean ± SEM. NS=non-significant.

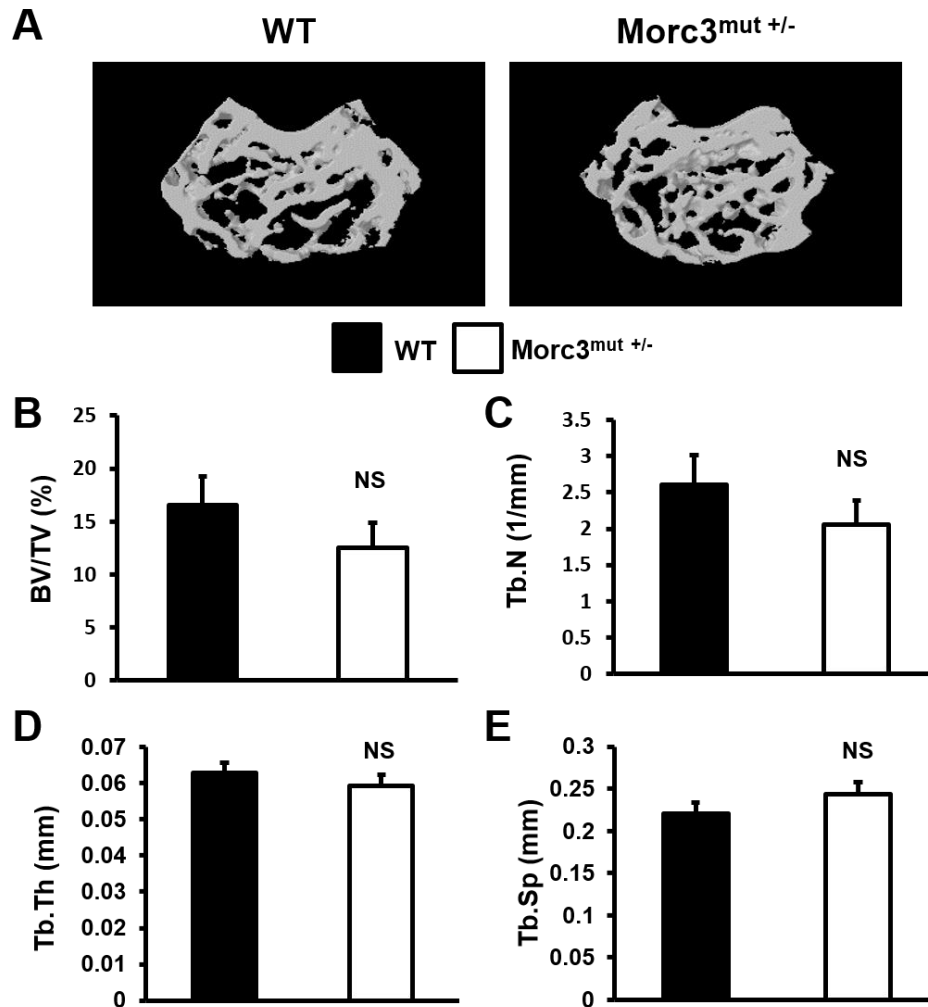

**Supplementary Figure 4: No difference in trabecular bone mass in older male**

**Morc3<sup>mut +/-</sup> mice.** MicroCT analysis of femurs from 24 week old male mutant mice revealed no difference in trabecular bone mass as compared to femurs from WT controls (n=5). (A) Representative 3D reconstructions of trabecular bone in 24 week old WT and Morc3<sup>mut +/-</sup> mice. (B-E) Trabecular bone parameters as assessed by microCT; (B) bone volume per total volume (BV/TV; %), (C) trabecular number (Tb.N; 1/mm), (D) trabecular thickness (Tb.Th; mm) and (E) trabecular separation (Tb.Sp; mm). Data are presented as mean/fold change ± SEM. NS=non-significant.

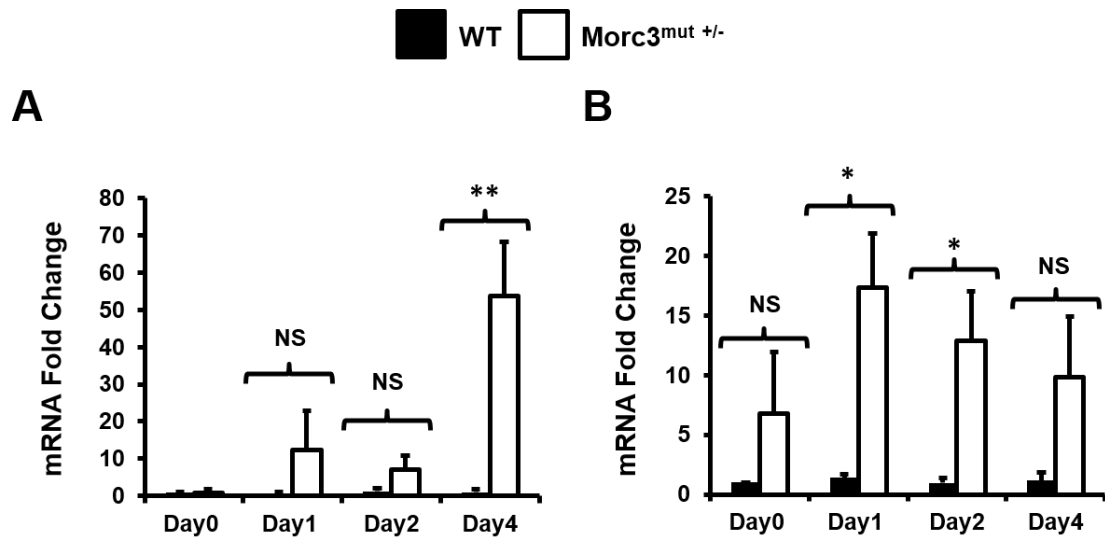

**Supplementary Figure 5: Mutation in Morc3 alters IFN- $\beta$  and STAT1 gene expression during RANKL-induced osteoclastogenesis.** BMMs were isolated from age- and sex-matched WT and Morc3<sup>mut +/-</sup> mice and cultured with RANKL (25ng/ml) and M-CSF for 5 days. Real Time-PCR analysis of (A) *Ifnb1* and (B) *Stat1* during osteoclast differentiation in Morc3<sup>mut +/-</sup> mice as compared to WT (n=3). *Hprt1* was used as integral housekeeping control (%). Data are presented as mean  $\pm$  SEM. NS=non-significant; \*P<0.05; \*\*P<0.01.
